# Supplementary material for: Understanding resource driven female–female competition: ovary and liver size in sand gobies
Source: PubMed Central journal article supplement (PMC6774974; doi:10.1098/rsos.190886), 2019-09-11
Supplement: rsos190886supp2.pdf [file rsos190886supp2.pdf]

## Supplementary Material II

| RMI (Reproductive Maturity Index) |                                                                                     |                                                                                      |
|-----------------------------------|-------------------------------------------------------------------------------------|--------------------------------------------------------------------------------------|
| 0.75                              |    |    |
| 1.00                              |    |    |
| 1.25                              |    |    |
| 1.50                              |    |                                                                                      |
| 1.75                              |   |   |
| 2.00                              |  |  |
| 2.25                              |  |  |
| 2.50                              |  |  |
| 2.75                              |  |  |
| 3.00                              |  |  |

Figure S1. Reproductive maturity index (RMI) of sand goby (*Pomatoschistus minutus*) females, ranging 0.75-3.00. Photographed females were either caught in June 2014, in Bökevik, Sweden, or Tvärminne, Finland. RMI values  $\geq 2.25$  indicate females that are ready to spawn.
